# Supplementary material
Source: PubMed Central journal article supplement (PMC6927880)
Supplement: jiy251_suppl_supplementary_figures.pdf [file jiy251_suppl_supplementary_figures.pdf]

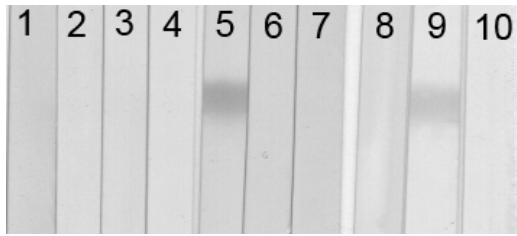

**Supplementary Figure 1. Sudan virus Western Blot.** Lane 1-4 = negative patient serum, lane 5 = positive patient serum, lane 6-8 = negative patient serum, lane 9 = Rabbit anti-SUDV GP Polyclonal antibody, lane 10 = negative Ugandan patient serum pool. Positive bands running at 150 kDa.

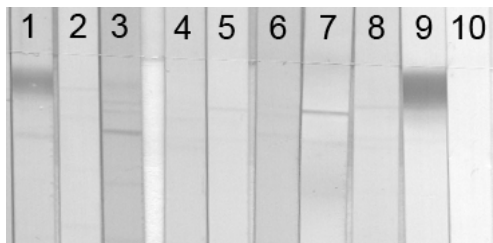

**Supplementary Figure 2. Ebola virus Western Blot.** Lane 1 = positive patient serum, lane 2 = negative patient serum, lane 3 = indeterminate patient serum, lane 4-8 = negative patient serum, lane 9 = convalescent serum from a human vaccinated with VSV-EBOV following suspected exposure to EBOV, lane 10 = negative Ugandan patient serum pool. Positive bands running at 150 kDa.

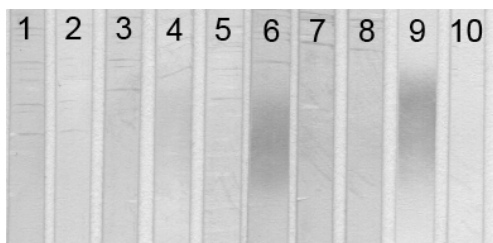

**Supplementary Figure 3. Bundibugyo virus Western Blot.** Lane 1-5 = negative patient serum, lane 6 = positive patient serum, lane 7-8 = indeterminate patient serum, lane 9 = convalescent

serum from BDBV-infected macaque, lane 10 = negative Ugandan patient serum pool. Positive bands running at 60 kDa.
